# Supplementary material
Source: PubMed Central journal article supplement (PMC3198326)
Supplement: 1109435108_pnas.1109435108_SI.pdf [file 1109435108_pnas.1109435108_SI.pdf]

# Supporting Information

Burda et al. 10.1073/pnas.1109435108

## SI Text

### Detailed Specification of the Model. *The transcriptional dynamics.*

The specification of the transcriptional dynamics requires including thermodynamic binding of transcription factors (TF) to their binding sites and modeling the consequences on the rate of transcription. Consider first the case where all  $N$  transcription factors affect gene  $i$  as activators. If at least one of the binding sites is occupied by its TF, we consider that the gene will be transcribed; this choice corresponds to having the transcription rate be proportional to the Probability of OCCupation or “POCC” (1) of the regulatory region. In the simplest framework, we take the bindings to arise independently (no cooperativity). In addition, we identify up to an overall scale the transcription rate of a gene with the POCC of its regulatory region. Considering that protein content is proportional to transcription rate (at least in the steady-state), we set  $S_i$ —the mean normalized expression level of gene  $i$ —equal to this POCC. Using Eq. 1 of the main part of the paper, one then obtains

$$S_i = 1 - \prod_j (1 - P_{ij}). \quad [\text{S1}]$$

This equation is basic for the “mean field” model of ref. 2 in which the neglect of fluctuations and the corresponding limitations were explained. Note that if the  $P_{ij}$  are small, transcription is additive in these variables, while in the binary limit where  $P_{ij}$  is 0 or 1,  $S_i$  corresponds to the logic of transcription being “on” if and only if at least one of the binding sites is occupied, as expected from the use of the POCC.

Our treatment of *inhibitory* interactions (due to repressors) is new and is motivated by a number of known cases where the binding of a TF acts as a veto, for example if the presence of the TF makes the DNA form a loop that conceals the other binding sites. Another mechanism for vetoing transcription is simply for the bound TF to block access of the polymerase to its promoter. Within our framework, transcription proceeds as in Eq. S1 in the absence of any repressors, but as soon as any of the inhibitory sites are bound by their repressors, transcription is turned off. Again assuming there are no cooperative effects, and repeating for repressors the argument just used for activators, we are led to modify Eq. S1 to

$$S_i = [1 - \prod_j (1 - P_{ij})] \prod_{j'} (1 - P_{ij'}), \quad [\text{S2}]$$

where  $j$  runs over activating interactions and  $j'$  over inhibitory interactions.

By neglecting cooperative effects, we have obtained a model where the main parameters are those determining the binding probabilities implicit in Eq. 1 in the main part of the paper and these are subject to experimental constraints. All of our results are given for this model. Incorporating cooperative effects could lead to a more realistic model but at the cost of more parameters. We now propose a way to generalize the framework described so far. Reconsider the POCC of gene  $i$ 's regulatory region; we denote by  $P_i$  this probability. Assuming that

$$P_i = \sum_{k \geq 1} \sum_{[j_1, \dots, j_k]} P_i^{(k, N-k)}(j_1, \dots, j_k, \bar{j}_{k+1}, \dots, \bar{j}_N), \quad [\text{S3}]$$

where  $j_l$  ( $\bar{j}_l$ ) is the label of an occupied (unoccupied) binding site and  $[j_1, \dots, j_k]$  stands for a combination of  $k$  out of  $N$  gene labels.

For pedagogical reasons, reconsider the case where the bindings arise independently (no cooperativity). Then the probabilities in the sum on the right hand side would factorize into a product of terms  $P_i^{(1,0)}(j)$  (or  $P_i^{(0,1)}(\bar{j})$ ). Replacing  $P_i^{(1,0)}(j)$  by  $P_{ij}$  defined in Eq. 1 of the main part of the paper, we have

$$P_i^{(k)}(j_1, \dots, j_k, \bar{j}_{k+1}, \dots, \bar{j}_N) = \prod_j P_{ij} \times \prod_{j'} (1 - P_{ij'}), \Lambda \quad [\text{S4}]$$

where  $j$  runs over indices for which the binding site is occupied and  $j'$  runs over the other indices. Then the sum over  $k$  in Eq. S3 can be explicitly performed. However, to obtain a generalization of these equations so as to allow nonindependent binding probabilities, one could for instance replace in Eq. S4 the equality by a proportionality. Such an identification often appears in the literature: using the stationary limit of appropriate kinetic equations, one argues that the concentration of a molecular complex is proportional to the product of concentrations of the constituents. Here, because of the reparametrization symmetry of the dynamics, the proportionality constant can only depend on  $k$ . One could then truncate the sum over  $k$ , say at  $k = 3$ , to avoid too many free parameters, a situation that arises in a number of genetic network reverse engineering attempts. Such a model deserves study, but that would take us much beyond the scope of the present work.

**Defining phenotypes.** The genotype of the GRN is its *hardware*, specified by the list of interaction weights  $W_{ij}$  themselves determined by the mismatches between the character strings associated with TF and binding sites. By convention, we make the weight negative for a repressor and positive for an activator. The phenotype of a given GRN is associated with its expression behavior which follows from the transcriptional dynamics. We consider two cases of behavior. In the first, we focus on the steady-state expression vectors (fixed points of the transcriptional dynamics). In the second, we focus on cyclic behavior of the expression vectors.

Given a GRN genotype, determining its phenotype is straightforward in practice. In the first case where we have given target expression patterns, we start in these target vectors and we see whether we converge to a nearby fixed point under iteration of the transcriptional dynamics. (In contrast, in our previous work, we had considered initial states that were unrelated to the target vector.) In the second case, we start with one of the patterns in the target cycle and see whether the trajectory under iterations stays close to that cycle. For the steady-state behavior, we shall impose 2, 3, or more vectors that consist of  $N/2$  levels at 0 and  $N/2$  at 1, and furthermore these vectors are taken to be orthogonal (for the 0/1 coding for  $S_i$  this means that the scalar product of two vectors is  $N/4$ ). Setting  $N = 16$  (the choice of  $N$  is not important as long as it has a moderate value, we have not explored what happens at large  $N$ ), we define four mutually orthogonal targets as follows, a direct generalization of that of ref. 2:

$$\begin{array}{cccccccccccccccc} 1 & 1 & 1 & 1 & 1 & 1 & 1 & 1 & 0 & 0 & 0 & 0 & 0 & 0 & 0 & 0 \\ 1 & 1 & 1 & 1 & 0 & 0 & 0 & 0 & 1 & 1 & 1 & 1 & 0 & 0 & 0 & 0 \\ 1 & 1 & 0 & 0 & 1 & 1 & 0 & 0 & 1 & 1 & 0 & 0 & 1 & 1 & 0 & 0 \\ 1 & 0 & 1 & 0 & 1 & 0 & 1 & 0 & 1 & 0 & 1 & 0 & 1 & 0 & 1 & 0 \end{array}$$

This choice is motivated by the fact that at large  $N$ , random binary vectors are typically nearly orthogonal. The symmetries of the



not merely a consequence of starting with the right expression vector. For instance, in the case of the fixed point phenotypes, these basins constitute approximately 99.8(9)%, 52.9(9)%, and 49.6(8)% of the whole space for  $n = 2, 3$ , and 4 respectively. With our choice of target phenotypes and the permutation symmetry of the model, the basins associated with individual targets are equal (after averaging over functional GRNs).

**Statistics of essential interactions.** The essential network provides a summary of the GRN genotype that can be more easily understood than the full genotype. A key feature of this summary is its sparseness: there are few essential interactions controlling any given gene. Another property is the relative frequency of inhibitory and activating interactions. For pedagogical reasons, let us first consider this issue at the level of all interactions, not just the essential ones. Even though the genotypes generated by the MCMC sampling have functional constraints, they contain many small  $W_{ij}$  that have hardly any effect on the phenotype; the sign of these interactions are thus random, and in effect these  $W_{ij}$  act as noise. If instead we focus on the larger  $W_{ij}$ , the functional constraints are likely to bias the sign in favor of activating interactions. To avoid an arbitrary definition of large weights, it is advantageous to use the notion of essentiality because of its link with phenotypes. For the essential networks produced from the GRN of our MCMC with the constraint of two to four steady states, we find that the great majority of the essential interactions are activating, see Table S1 (these numbers are not sensitive to  $N$ ). These results are not surprising, but increasing the number of constraints forces the connections to be more complex and to make greater use of inhibitory interactions. In the toy cases of genes on a ring, we also have this general picture and find that the number of both activating and inhibitory essential interactions grows linearly with  $N$ .

**Abundance of functional essential networks.** Another question of interest concerns the number of distinct functional essential networks. The number of distinct GRNs is of little interest, being trivially enormous because all inessential interactions can be changed at will without affecting the phenotype. It is wise to first find the essential networks that are in a sense representative of a group of GRNs, in other words to perform a cluster analysis of the sample of essential networks at our disposal. Let the numbers of such networks be  $M$  and define a distance between a pair of them, for example

$$\text{Distance}(A,B) = \sum_{ij} (A_{ij} - B_{ij})^2, \quad [S7]$$

where  $A_{ij}, B_{ij}$  are  $\pm 1$  for essential interactions and 0 otherwise. Our question can now be reformulated more precisely: does the number of clusters, considered as a proxy for the number of representative essential networks, saturate at some moderate value as  $M$  grows? (It must saturate somewhere, of course, but that may be for very large  $M$  values.) To answer this question, it is most convenient to use the modern affinity propagation algorithm (5), where the number of clusters is not preassigned but is determined by the algorithm; the code can be downloaded from Frey Laboratory Web page at Toronto University. As an illustration, for four fixed points we find that the number of clusters grows

at large  $M$  roughly like  $M^{2/3}$  (with a prefactor of the order of 0.3) and shows no sign of saturation up to at least  $M = 4,000$ . Other values of  $n$  lead to similar results, but some care is necessary in interpreting these trends at  $n = 2$  and 3. Indeed, it turns out that for these values of  $n$  many clusters, distinct according to Eq. S7, have essentially the same topology and differ merely by the labeling of nodes (this reflects symmetries in our choice of the target phenotypes). In contrast, for  $n = 4$  the clusters are genuinely different. To get more insight into this problem, we have carried out a complementary investigation, counting the number of distinct topologies (instead of using the clustering algorithm). This task is very tedious and our account of the network reparametrizations was only partial. With this proviso, it appears that the number of distinct topologies again increases like a power of  $M$ , however now the exponent increases with  $n$  (approximately from 0.69 for  $n = 2$  to 0.97 for  $n = 4$ ).

**Motif frequency.** The frequency of the most prominent motifs in our model is shown in Table S2.

**Motifs using interaction strengths rather than essentiality.** In our framework, every gene has some interaction with every other, so any analysis has to focus on the most relevant ones. So far, we have used the essentiality criterion, which keeps the functionally relevant interactions. What happens if instead we use the interaction strength as criterion? To address this question, we have recomputed the motif frequencies in the case of the cyclic phenotypes with a criterion based on the interaction's mismatch. Explicitly, we consider an interaction only if its mismatch is less or equal to  $M_{\max}$ . In Fig. S2 we show the dependence on  $M_{\max}$ . For small mismatches, the degree of overrepresentation of motifs is insensitive to  $M_{\max}$ , and so the result is nearly identical to that obtained when essentiality is used. However for larger allowed mismatches, we see that the overrepresentation of motifs drops sharply towards the background value frequency of randomized networks. This behavior is expected because allowing for large mismatches introduces  $W_{ij}$  that act like random noise.

**A small oscillating GRN.** To provide further insight into the properties of the transcriptional dynamics of our model, we consider here a small GRN with just three genes. We take the cyclic phenotype where each gene is turned on successively, with target expressions set to (1,0,0), (0,1,0), and (0,0,1). In Fig. S3 we show an example of a GRN produced and in which we show the successive expression levels when starting in the (1,0,0) configuration. In the absence of any input, a gene on its own will have a very low level of transcription within our model. To turn on during a cycling, a gene has to receive an activating signal from its predecessor. These signals are represented by the three red (activating) arrows in Fig. S3. [This feature differentiates our system from the repressilator network in which the genes are constitutively *on* (6).] In the presence of just these three activating interactions, the expression levels will end up all rising, approaching the (1,1,1) state. To prevent this saturation, multiple repressors are necessary. One way to achieve this goal is for all three genes to be self repressive and to repress their predecessor, but the MCMC finds more sparse solutions than that: here we see that two repressors are sufficient to have the desired cyclic behavior.

1. Granek J, Clark N (2005) Explicit equilibrium modeling of transcription-factor binding and gene regulation. *Genome Biology* 6:R87.
2. Burda Z, Krzywicki A, Martin OC, Zagorski M (2010) Distribution of essential interactions in model gene regulatory networks under mutation-selection balance. *Physical Review E* 82:011908.
3. Li F, Long T, Lu Y, Ouyang Q, Tang C (2004) The yeast cell-cycle network is robustly designed. *Proc Natl Acad Sci* 101:4781–4786.
4. Metropolis N, Rosenbluth A, Rosenbluth M, Teller A, Teller E (1953) Equation of state calculations by fast computing machines. *J Chem Phys* 21:1087–1092.
5. Frey B, Dueck D (2007) Clustering by passing messages between data points. *Science* 315:972–976.
6. Elowitz M, Leibler S (2000) A synthetic oscillatory network of transcriptional regulators. *Nature* 403:335–338.

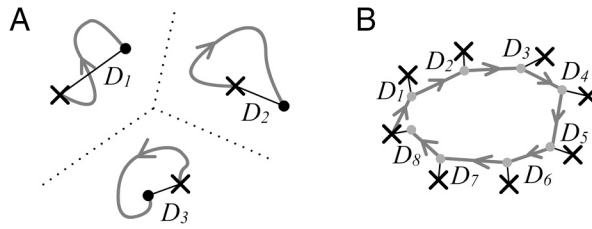

**Fig. S1.** A schematic representation of our MCMC process. (A) Steady-state behavior and  $n = 3$ : crosses (heavy dots) stand for the target (fixed point) states, while the line is the system's trajectory. The "total" distance entering the Metropolis test is  $D_T = D_1 + D_2 + D_3$ . (B) Similar as before, but for a cycle. Gray dots stand for successive states obtained by iterating Eq. S2. Here  $D_T = D_1 + \dots + D_8$ .

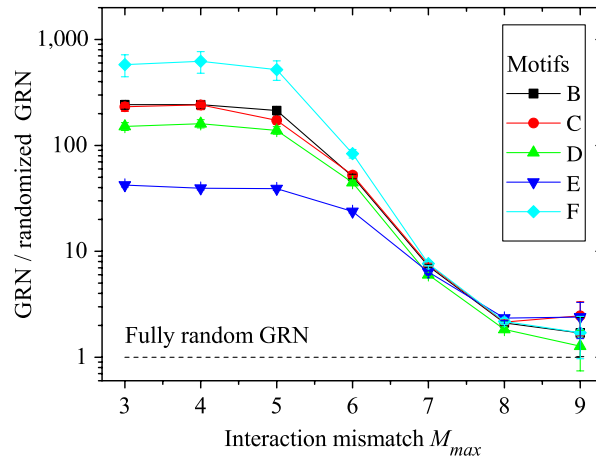

**Fig. S2.** Overrepresentation of motifs as a function of the interaction strengths allowed. The x axis gives the maximum mismatch  $M_{max}$  for an interaction to be included in the search for motifs. The y axis gives the frequency of each motif divided by the frequency in the randomized ensemble. We see that these ratios of frequencies are insensitive to  $M_{max}$  at low values but then rapidly decrease towards 1 at larger  $M_{max}$ . ( $N = 16$  and cyclic phenotypes are imposed.)

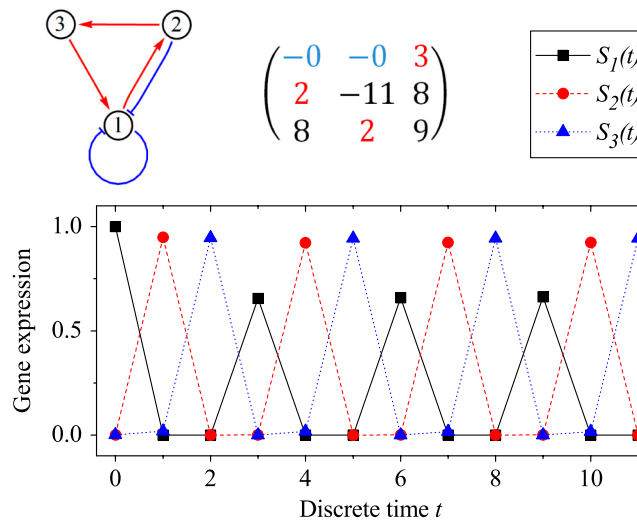

**Fig. S3.** A small system of three genes exhibiting oscillatory behavior. (Top) The network of essential interactions with the corresponding matrix of mismatches  $\{d_{ij}\}$  (blue interactions and minus signs indicating repressors). (Bottom) The gene expression levels  $S_i(t)$  produced by the transcriptional dynamics starting with the 1st gene being *on* and the other two being *off*.
